# Supplementary material
Source: MDPI journal article supplement (https://www.mdpi.com/2077-1312/12/4/670)
Supplement: s1 [file s1]

# Submarine Morphological Description of the Ancient Archipelagic Aprons in the Marcus–Wake Seamount Group, Northwestern Pacific Ocean

Xiao Wang <sup>1</sup>, Huaiming Li <sup>1,2,\*</sup>, Yongshou Cheng <sup>3</sup>, Pengfei Yao <sup>1</sup>, Fengyou Chu <sup>1</sup>, Weilin Ma <sup>1</sup>, Hongyi Wang <sup>2</sup>, Shihui Lv <sup>4</sup>, Xiaohu Li <sup>1</sup>, Zhenggang Li <sup>1</sup>, Weiyan Zhang <sup>1</sup> and Yanhui Dong <sup>1</sup>

<sup>1</sup> Key Laboratory of Submarine Geosciences, Second Institute of Oceanography, Ministry of Natural Resources, Hangzhou 310012, China; wangxiao@sio.org.cn (X.W.); yaopf@sio.org.cn (P.Y.); chu@sio.org.cn (F.C.); weilin\_ma@sio.org.cn (W.M.); xhli@sio.org.cn (X.L.); lizg@sio.org.cn (Z.L.); zwy885@163.com (W.Z.); dongyh@sio.org.cn (Y.D.)

<sup>2</sup> Beijing Pioneer High-Tech Corporation, Beijing 100081, China; sallywang166@sina.com

<sup>3</sup> National Marine Data Information Center, Tianjin 300012, China; yshcheng@163.com

<sup>4</sup> School of Ocean Sciences, China University of Geosciences (Beijing), Beijing 100083, China; lvshihui@cugb.edu.cn

\* Correspondence: huaiming\_lee@163.com

## Contents of this file

**Figure S1.** (a–b) Topographic profile of the Suda guyot.

**Figure S2.** (a–b) Topographic profile of the Aronld guyot.

**Figure S3.** Sediment waves topography profile of Suda guyot.

**Figure S4.** Sediment waves topography profile of Arnold guyot.

**Figure S5.** Sediment waves topography profile of Lamont guyot.

**Figure S6.** Sediment waves topography profile of Niulang and Zhinyv guyot.

**Figure S7.** Relationship between the width and relief of gullies and channels.

**Figure S8.** Relationship between the width and slope of gullies and channels.

**Figure S9.** Relationship between the relief and slope of gullies and channels.

**Figure S10.** Relationship between the width and height of gullies and channels.

**Figure S11.** Relationship between the wavelength and slope of sediment waves at different scales.

**Figure S12.** Relationship between the wave height and slope of sediment waves at different scales.

**Figure S13.** Small-scale sediment wave formation model (modified from Symons et al., 2016) [22].

**Table S1.** Submarine fan topography data.

**Table S2.** Sediment waves topography data.

## Introduction

The software of Global Mapper was used to estimate various geomorphic features following the methodology described in Gardner et al. (2021) [3] and Watt et al. (2014) [14]. The results of these analyses are presented in Table S1. In addition, cross-sectional profiles of the terrain were extracted at 5-km intervals between gullies and channels, and parameters such as width, relief, and slope on both sides were derived from the profiles. Following the methodology described in Symons et al. (2016) [22], Global Mapper was utilized to extract parameters such as wavelength, wave height, and slope of sediment waves deposit. The results of these analyses are presented in Table S2.

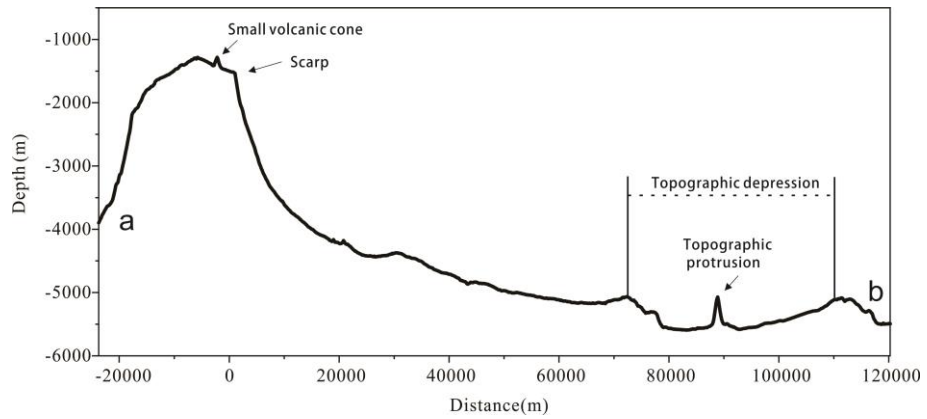

**Figure S1.** (a–b) Topographic profile of the Suda guyot.

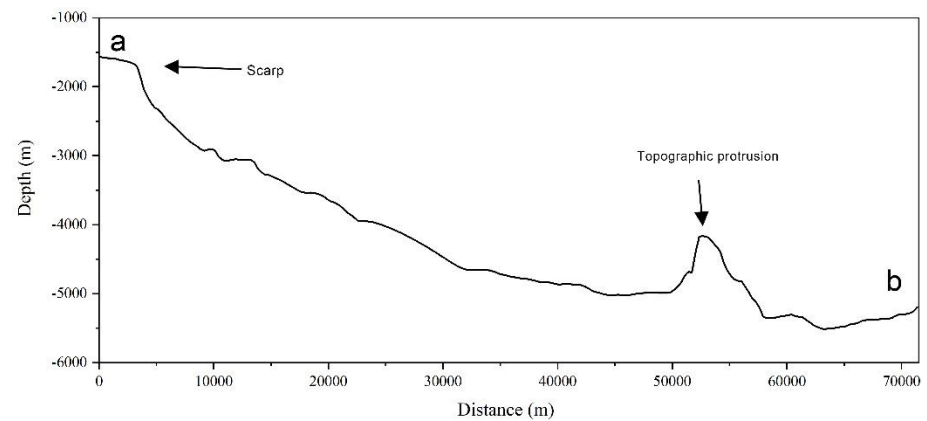

**Figure S2.** (a–b) Topographic profile of the Aronld guyot.

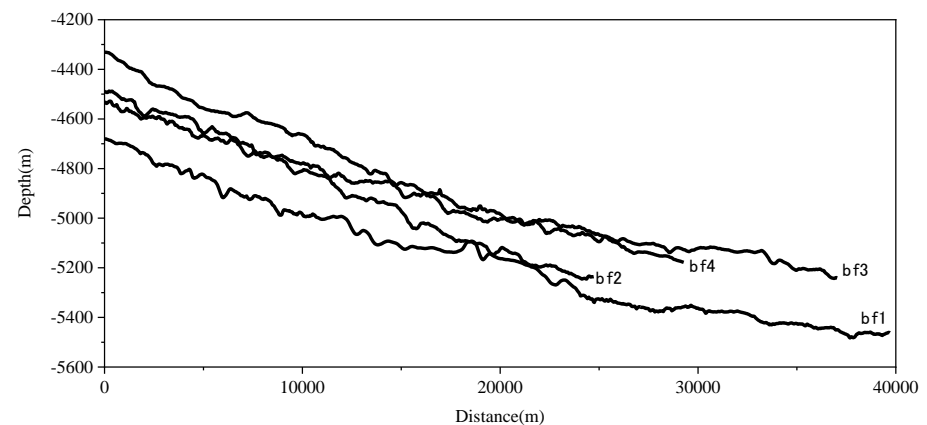

**Figure S3.** Sediment waves topography profile of Suda guyot.

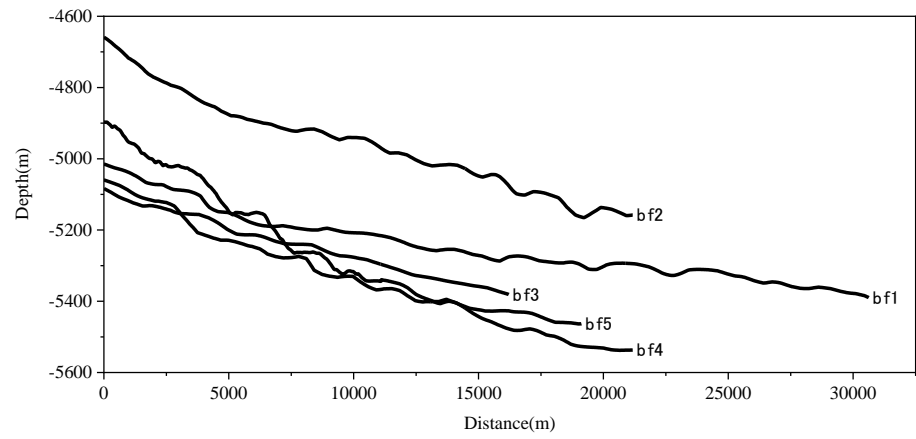

**Figure S4.** Sediment waves topography profile of Arnold guyot.

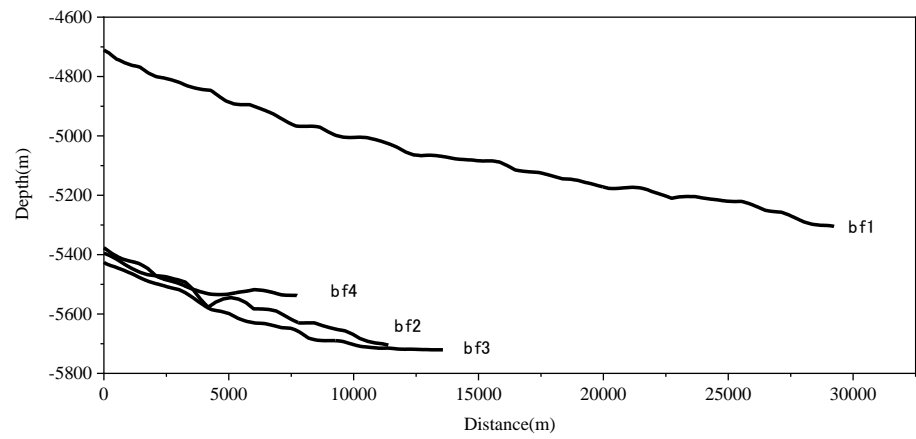

**Figure S5.** Sediment waves topography profile of Lamont guyot.

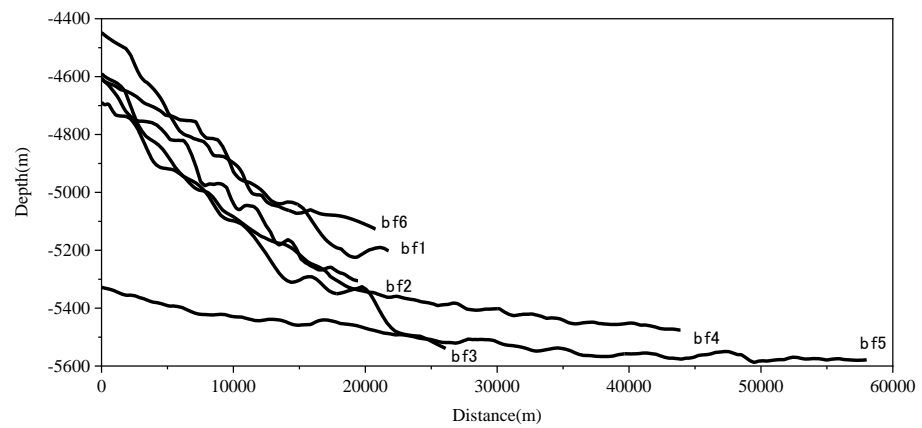

**Figure S6.** Sediment wave topography profile of Niulang and Zhinyv guyot.

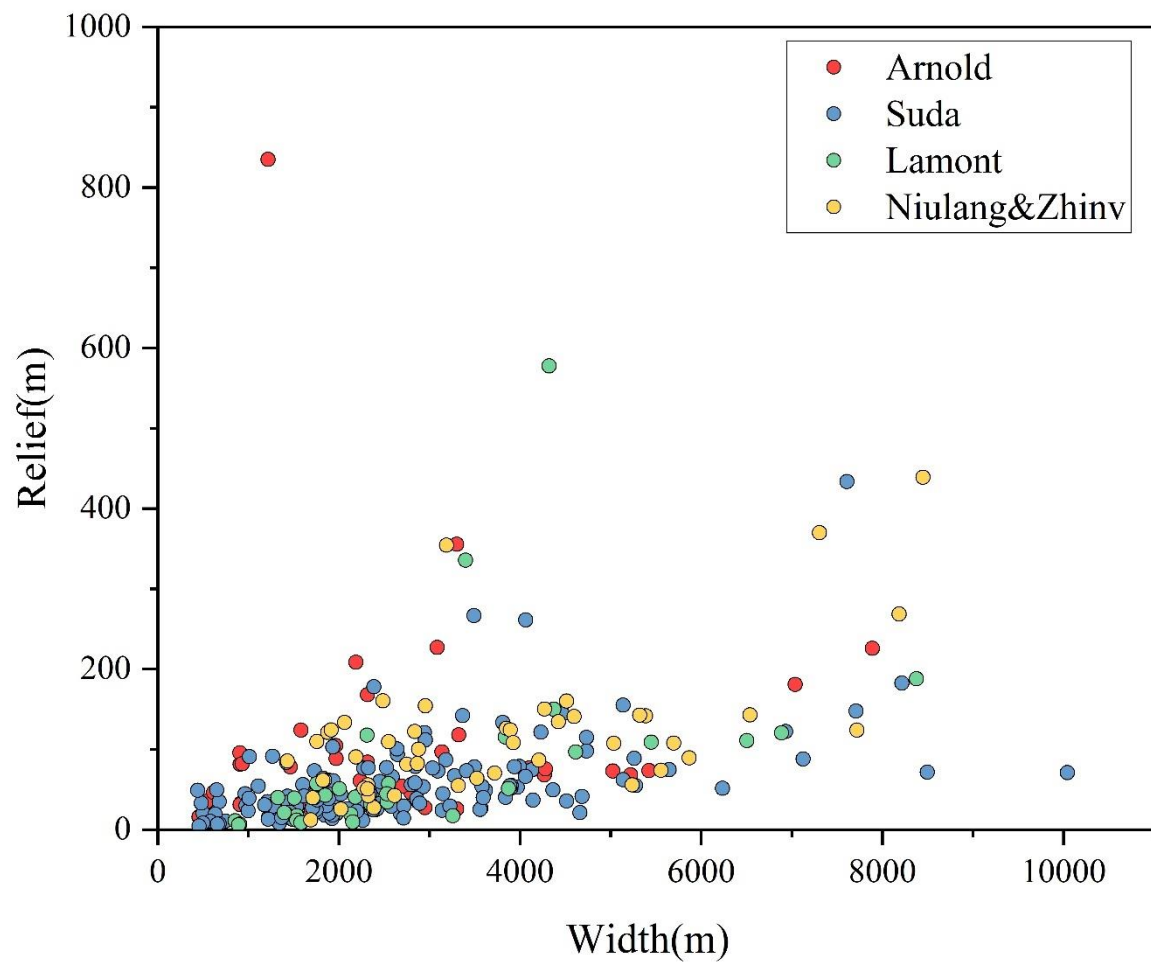

**Figure S7.** Relationship between the width and relief of gullies and channels.

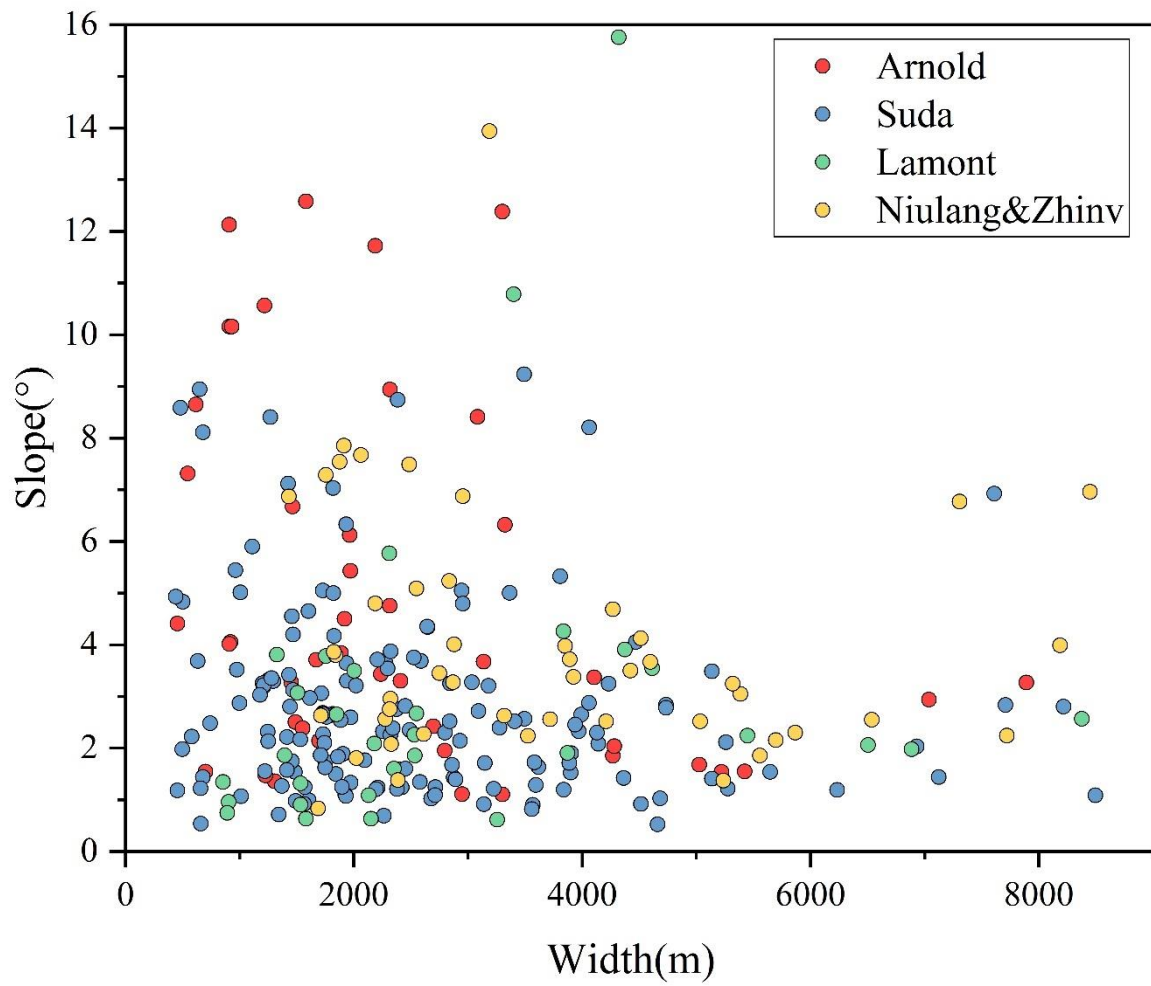

**Figure S8.** Relationship between the width and slope of gullies and channels.

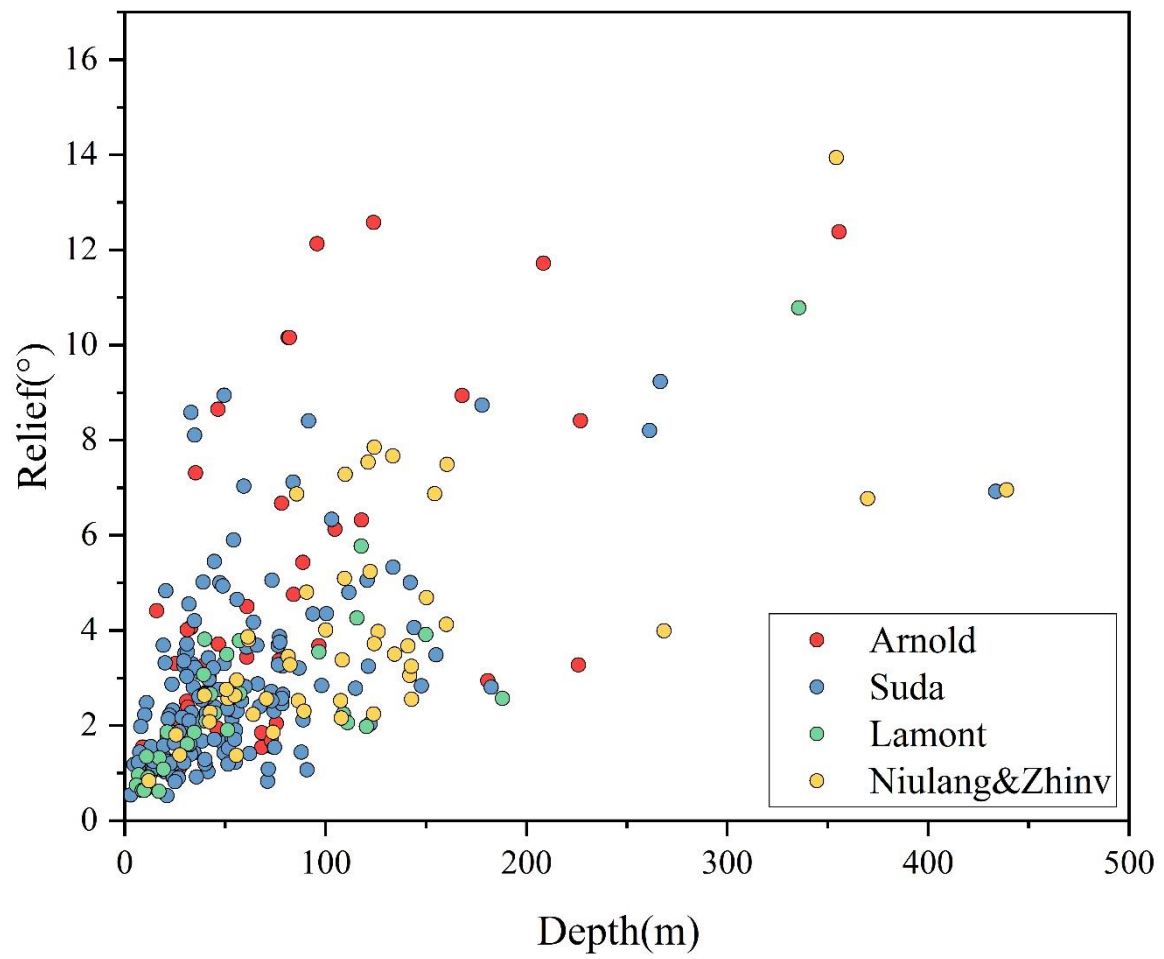

**Figure S9.** Relationship between the relief and slope of gullies and channels.

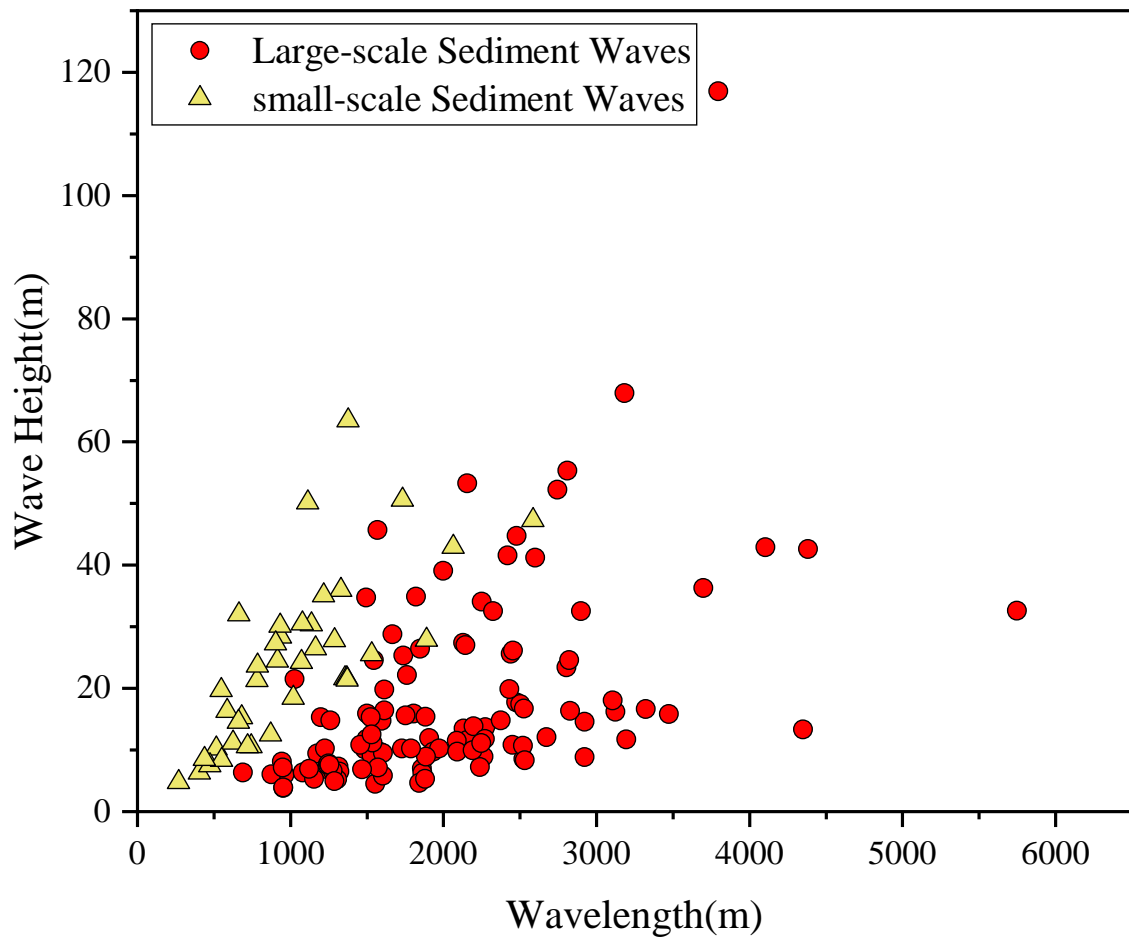

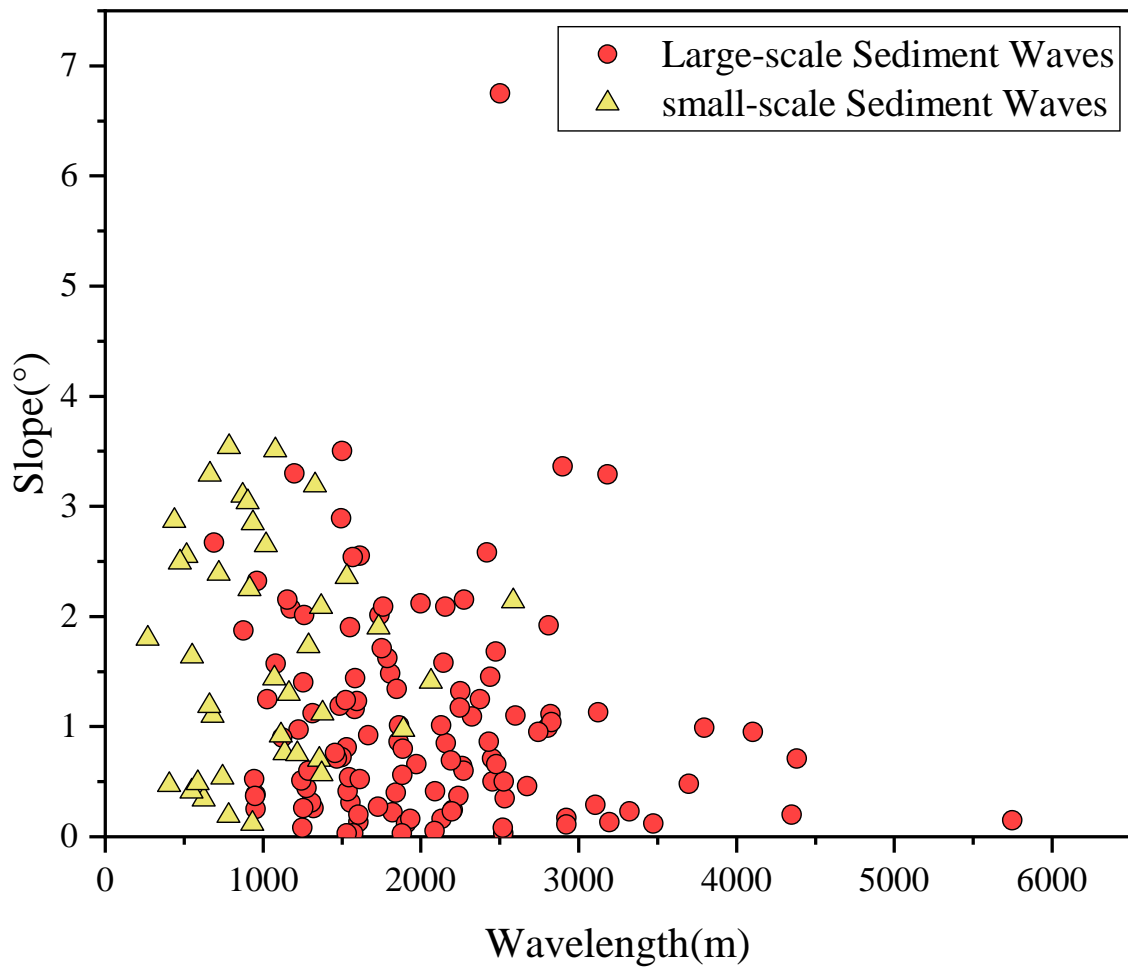

**Figure S11.** Relationship between the wavelength and slope of sediment waves at different scales.



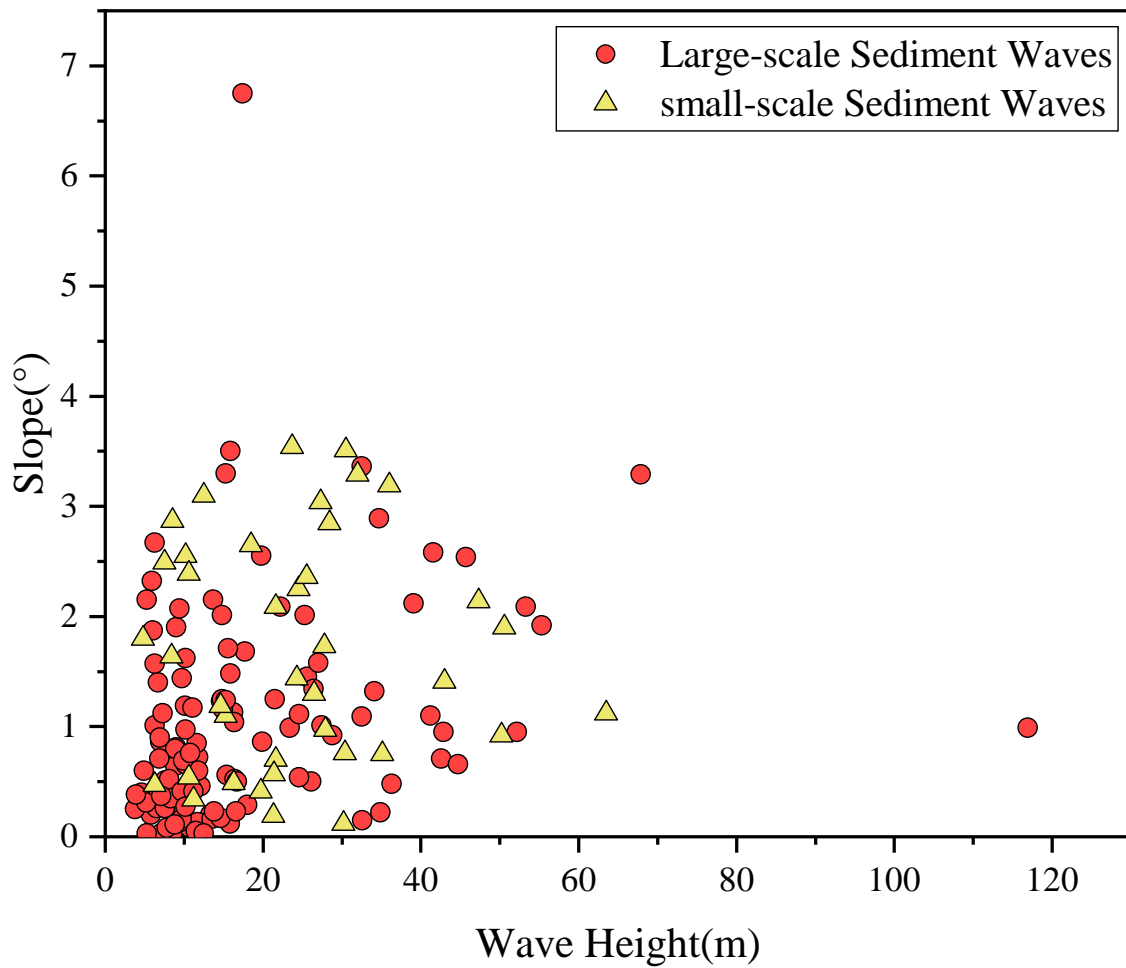

Figure S12. Relationship between the wave height and slope of sediment waves at different scales.

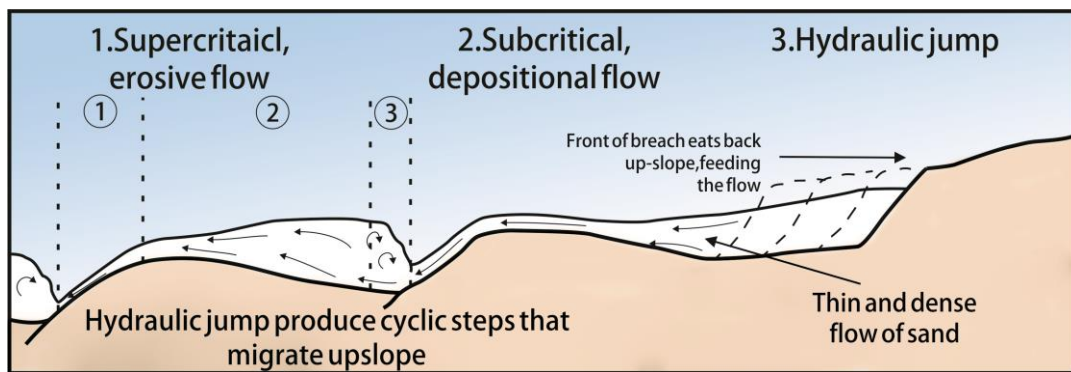

Figure S13. Small-scale sediment wave formation model (modified from Symons et al., 2016) [22].

Table S1. Aprons' topography data

|                           | Number   | Sediment and Debris Runout Distance (km) | Maximum Runout Distance (km) | Sediment and Debris Run from the Headwall Base (km) | Area of Apron Deposit (km <sup>2</sup> ) | Scarp Shape      | Scarp Length (km) | Fan Area (km <sup>2</sup> ) | Type of Landslide | Slope (°) | Backscatter (dB) |
|---------------------------|----------|------------------------------------------|------------------------------|-----------------------------------------------------|------------------------------------------|------------------|-------------------|-----------------------------|-------------------|-----------|------------------|
| <b>Arnold</b>             | AP-01    | 51.00                                    | 51.00                        | 30.00                                               | 439.32                                   | Convex arc       | 6.8               | 1484.19                     | Slump             | 3         | -24.0            |
|                           | AP-02    | 51.84                                    | 51.85                        | 28.87                                               | 770.51                                   | Complex arc      | 31.1              | 1801.19                     | Debris avalanche  | 3         | -28.5            |
|                           | AP-03    | 49.86                                    | 51.62                        | 10.71                                               | 449.05                                   | Complex arc      | 14.3              | 1114.24                     | Rock failure      | 3         | -33.0            |
|                           | AP-04    | 54.58                                    | 54.58                        | 22.63                                               | 988.43                                   | Complex arc      | 41.7              | 2479.59                     | Debris avalanche  | 3         | -34.0            |
|                           | AP-05    | 20.25                                    | 27.12                        | 8.74                                                | 41.64                                    | Invagination arc | 14.2              | 126.70                      | Debris avalanche  | 5         | —                |
| <b>Lamont</b>             | AP-01    | 29.6.00                                  | 42.10                        | 10.8.0                                              | 351.70                                   | Complex arc      | 33.5              | 756.70                      | Debris avalanche  | 3         | -35.0            |
|                           | AP-02    | 35.4.00                                  | 39.80                        | 16.7.0                                              | 255.20                                   | Invagination arc | 37.3              | 139.00                      | Debris avalanche  | 3         | -35.0            |
|                           | AP-03    | 32.00                                    | 32.00                        | 9.65                                                | 169.90                                   | Complex arc      | 32.4              | 605.80                      | Debris avalanche  | 5         | -35.0            |
|                           | AP-04    | 23.9.00                                  | 26.30                        | 12.90                                               | 308.70                                   | Complex arc      | 40.7              | 807.90                      | Rock failure      | 7         | -35.0            |
|                           | AP-05    | 24.4.00                                  | 28.90                        | 5.80                                                | 364.00                                   | Invagination arc | 17.4              | 505.00                      | Debris avalanche  | 3         | -31.0            |
|                           | AP-06    | 33.4.00                                  | 39.30                        | 13.90                                               | 442.10                                   | Complex arc      | 47.8              | 941.80                      | Debris avalanche  | 1         | -34.5            |
|                           | AP-07    | 16.5.00                                  | 25.30                        | 6.40                                                | 231.40                                   | Complex arc      | 19.3              | 490.00                      | Debris avalanche  | 7         | -33.5            |
|                           | AP-08    | 26.7.00                                  | 26.70                        | 20.80                                               | 28.40                                    | Invagination arc | 19.0              | 243.25                      | Debris avalanche  | 3         | -34.5            |
| <b>Niulang and Zhinyv</b> | AP-01    | 62.85                                    | 75.84                        | 32.68                                               | 1432.21                                  | Complex arc      | 35.6              | 3351.00                     | Debris avalanche  | 3         | -36.0            |
|                           | AP-02    | 24.18                                    | 24.18                        | 19.40                                               | 98.91                                    | Complex arc      | 17.2              | 504.00                      | Debris avalanche  | 5         | —                |
|                           | AP-03-e  | 54.62                                    | 54.62                        | 44.81                                               | 502.56                                   | Invagination arc | 20.4              | 2204.00                     | Debris avalanche  | 3         | -34.5            |
|                           | AP-03-w  | 70.00                                    | 95.73                        | 40.75                                               | 90.98                                    |                  |                   |                             |                   |           |                  |
|                           | AP-04    | 24.91                                    | 29.25                        | 11.15                                               | 193.85                                   | Complex arc      | 18.9              | 364.00                      | Debris avalanche  | 5         | -34.5            |
|                           | AP-05    | 39.36                                    | 52.39                        | 17.73                                               | 605.70                                   | Complex arc      | 21.1              | 1268.00                     | Debris avalanche  | 5         | -34.5            |
|                           | AP-06    | 51.16                                    | 51.16                        | 32.12                                               | 504.21                                   | Invagination arc | 34.6              | 875.78                      | Debris avalanche  | 5         | —                |
|                           | AP-07    | 51.23                                    | 70.17                        | 15.58                                               | 1022.64                                  | Convex arc       | 20.4              | 1886.00                     | Debris avalanche  | 3         | -32.0            |
|                           | AP-08    | 38.92                                    | 38.92                        | 24.09                                               | 179.45                                   | Invagination arc | 42.6              | 711.00                      | Debris avalanche  | 5         | —                |
|                           | AP-09    | 25.48                                    | 25.48                        | 8.61                                                | 119.66                                   | Invagination arc | 6.8               | 161.00                      | Debris avalanche  | 7         | -30.5            |
|                           | AP-010-s | 70.37                                    | 70.37                        | 37.01                                               | 650.53                                   | Complex arc      | 20.4              | 2444.00                     | Debris avalanche  | 5         | -34.5            |
|                           | AP-010-n | 39.22                                    | 39.22                        | 16.87                                               | 376.75                                   |                  |                   |                             |                   |           |                  |
| <b>Suda</b>               | AP-01    | 120.52                                   | 120.52                       | 31.69                                               | 8625.75                                  | Complex arc      | 42.0              | 11661.00                    | Slump             | 1         | -31.0            |
|                           | AP-02    | 17.27                                    | 17.27                        | 12.15                                               | 32.15                                    | Invagination arc | 6.5               | 125.50                      | Debris avalanche  | 2.5       | -21.5            |
|                           | AP-03    | 13.41                                    | 13.41                        | 9.70                                                | 54.00                                    | Invagination arc | 13.5              | 106.10                      | Debris avalanche  | 7.5       | -19.5            |
|                           | AP-04    | 19.43                                    | 21.31                        | 13.37                                               | 102.60                                   | Invagination arc | 11.6              | 234.70                      | Debris avalanche  | 5         | -19.0            |
|                           | AP-05    | 25.59                                    | 30.52                        | 12.56                                               | 387.89                                   | Complex arc      | 13.9              | 640.50                      | Rock failure      | 3         | -21.5            |

**Table S2.** Sediment waves deposit' topography data

|                           | Number of Profiles | Wavelength (m) | Wave Height (m) | Slope (°) | Depth Range (m) | Type of Cross-Section         | Crest Pattern                |
|---------------------------|--------------------|----------------|-----------------|-----------|-----------------|-------------------------------|------------------------------|
| <b>Arnold</b>             | 1                  | 995–3145       | 4.3–22.4        | 0.1–1.9   | 5000–5400       | Upslope asymmetric            | Sinuuous, straight           |
|                           | 2                  | 1345–2337      | 9.7–31.5        | 0.77–1.43 | 4600–5200       | Upslope asymmetric, symmetric | Crescentic, sinuous          |
|                           | 3                  | 1507–4228      | 5.6–15.3        | 0.77–1.43 | 5000–5400       | Symmetric                     | Straight, crescentic         |
|                           | 4                  | 997–2783       | 4.8–75.9        | 0.64–2.92 | 4890–5600       | Upslope asymmetric, symmetric | Reverse crescentic           |
|                           | 5                  | 1520–2825      | 10.8–21.1       | 0.67–2.52 | 5000–5500       | Symmetric                     | Sinuuous                     |
| <b>Lamont</b>             | 1                  | 963–3125       | 5.9–17.7        | 0.24–6.75 | 4700–5300       | Symmetric                     | Sinuuous                     |
|                           | 2                  | 876–2420       | 6.0–41.6        | 0.22–2.58 | 5400–5700       | Symmetric                     | Sinuuous                     |
|                           | 3                  | 1080–2441      | 6.3–25.6        | 0.64–2.15 | 5400–5700       | Symmetric                     | Reverse crescentic           |
|                           | 4                  | 690–1555       | 4.5–9.4         | 0.31–2.67 | 5400–5500       | Symmetric                     | Crescentic                   |
| <b>Niulang and Zhinyv</b> | 1                  | 1009–2425      | 13.8–46.7       | 1.71–3.22 | 4600–5200       | Symmetric                     | Sinuuous                     |
|                           | 2                  | 1724–2885      | 26.5–63.8       | 1.46–3.56 | 4600–5300       | Symmetric, upslope asymmetric | Sinuuous                     |
|                           | 3                  | 2430–4486      | 15.1–85.2       | 0.60–3.84 | 4500–5500       | Symmetric                     | Sinuuous                     |
|                           | 4                  | 1716–3390      | 6.9–56.5        | 0.02–2.18 | 4900–5500       | Symmetric                     | Reverse crescentic           |
|                           | 5                  | 1301–4826      | 8.4–29.5        | 0.01–0.49 | 5300–5600       | Symmetric                     | Crescentic, straight         |
|                           | 6                  | 2510–3247      | 40.3–60.4       | 1.72–3.85 | 4750–5050       | Symmetric                     | Sinuuous                     |
|                           | 2                  | 1123–3183      | 6.9–67.9        | 0.52–3.29 | 5600–6000       | Symmetric, upslope asymmetric | Straight                     |
|                           | 3                  | 1495–3796      | 11.8–116.9      | 0.6–2.89  | 5500–6100       | Symmetric                     | Sinuuous                     |
|                           | 4                  | 1029–2821      | 10.2–24.56      | 1.11–2.09 | 5600–5900       | Symmetric                     | Reverse crescentic           |
|                           | 5                  | 1879–4103      | 5.3–42.9        | 0.03–1.04 | 5200–5500       | Symmetric                     | Reverse crescentic           |
|                           | 6                  | 1288–3322      | 4.9–45.7        | 0.03–2.54 | 5300–5800       | Symmetric                     | Reverse crescentic, straight |
|                           | 7                  | 2144–3699      | 27–53.3         | 0.48–2.09 | 5350–5800       | Symmetric, upslope asymmetric | Reverse crescentic, straight |
| <b>Suda</b>               | 1                  | 514–1732       | 10.2–63.4       | 0.7–3.19  | 4800–5500       | Upslope asymmetric            | Crescentic                   |
|                           | 2                  | 916–2586       | 24.5–47.3       | 0.75–2.36 | 4700–5200       | Upslope asymmetric            | Crescentic                   |
|                           | 3                  | 268–1890       | 4.8–30.2        | 0.12–3.04 | 4500–5200       | Up, downslope asymmetric      | Crescentic                   |
|                           | 4                  | 439–1371       | 8.4–32          | 0.41–3.54 | 4600–5200       | Symmetric, upslope asymmetric | Crescentic                   |
